# Supplementary material for: Molecular Docking Simulation Studies Identifies Potential Natural Product Derived-Antiwolbachial Compounds as Filaricides against Onchocerciasis
Source: MDPI journal article supplement (doi:10.3390/biomedicines9111682), 2021-11-13
Supplement: s1 [file s1]

## 1 Supplementary Tables

**Table S1:** The top 5 protein structure templates predicted via SWISS-MODEL.

| Template ID | Sequence Identity (%) | Sequence Similarity | Coverage | Description                  |
|-------------|-----------------------|---------------------|----------|------------------------------|
| 1P4T        | 21.57                 | 0.29                | 0.63     | Outer membrane protein NspA. |
| 2MLH        | 16.67                 | 0.28                | 0.77     | Opacity protein opA60.       |
| 2MAF        | 16.67                 | 0.28                | 0.77     | Opacity protein opA60.       |
| 2X27        | 13.78                 | 0.26                | 0.81     | Outer Membrane Protein OPRG. |
| 6QAM        | 12.50                 | 0.26                | 0.80     | Outer membrane protein AlkL  |

**Table S2:** The DOPE and GA341 Scores of the 5 models predicted using Modeller.

| MODEL              | MOD1         | MOD2         | MOD3         | MOD4         | MOD5         |
|--------------------|--------------|--------------|--------------|--------------|--------------|
| <b>DOPE SCORE</b>  | -14228.31055 | -14368.33691 | -13027.42285 | -13800.28125 | -13815.10254 |
| <b>GA341 SCORE</b> | 0.00340      | 0.00087      | 0.00227      | 0.00143      | 0.00162      |

**Table S3:** The C-Scores of the 5 Models Predicted by I-TASSER

| MODELS         | ITAS1 | ITAS2 | ITAS3 | ITAS4 | ITAS5 |
|----------------|-------|-------|-------|-------|-------|
| <b>C-SCORE</b> | -2.16 | -2.70 | -3.07 | -3.39 | -3.38 |

**Table S4:** Structural Evaluation of the Robetta Generated Models using SAVES v5.0

| MODELS | MODEL SCORE |         |           |                   |
|--------|-------------|---------|-----------|-------------------|
|        | VERIFY (%)  | ERRAT   | PROVE (%) | PROCHECK          |
| ROB1   | 65.98       | 75.3304 | 5.7       | 2 E, 3 W and 3 P. |
| ROB2   | 70.95       | 78.97   | 4.7       | 2 E, 3 W and 3 P. |
| ROB3   | 63.90       | 73.2719 | 4.4       | 1 E, 5 W and 2 P. |
| ROB4   | 52.70       | 78.0822 | 3.8       | 4 E, 2 W and 3 P. |
| ROB5   | 63.49       | 77.8761 | 6.3       | 1 E, 4 W and 4 P. |

**Table S5:** Evaluation of the top 3 WSP models generated using Robetta, I-TASSER and Modeller. Models ROB2, ITAS1 and MOD2 were generated using Robetta, I-TASSER and Modeller, respectively.

|                        | MODEL SCORE                        |                                 |                                  |
|------------------------|------------------------------------|---------------------------------|----------------------------------|
|                        | ROB2                               | ITAS1                           | MOD2                             |
| VERIFY                 | 70.95 %                            | 72.2 %                          | 9.96 %                           |
| ERRAT (Quality Factor) | 78.97                              | 78.1116                         | 35.9649                          |
| PROVE                  | 4.7 %                              | 10 %                            | 9.3 %                            |
| PROCHECK               | 2 Errors, 3 Warnings and 3 Passes. | 7 Errors, 1 Warning and 0 Pass. | 3 Errors, 2 Warning and 3 Passes |

**Table S6:** ADME Prediction of some compounds for Gastrointestinal (GI); Blood Brain Barrier (BBB); Estimated Solubility (ESOL) class, P-glycoprotein (Pgp) and TPSA.

| Compound         | Molecular Weight (g/mol) | cLogP  | ESOL Class         | GI Absorption | BBB permeant | Pgp substrate | TPSA   | No of Veber's rule Violations | No. of Lipinski's rule violations |
|------------------|--------------------------|--------|--------------------|---------------|--------------|---------------|--------|-------------------------------|-----------------------------------|
| ZINC000095913861 | 556.6                    | 7.6813 | Poorly soluble     | Low           | No           | No            | 94.56  | 1                             | 0                                 |
| ZINC000070455413 | 532.49                   | 1.037  | Soluble            | Low           | No           | Yes           | 154.76 | 2                             | 1                                 |
| ZINC000103584225 | 590.53                   | 5.5823 | Poorly soluble     | Low           | No           | Yes           | 155.89 | 1                             | 1                                 |
| ZINC000085530783 | 588.86                   | 7.4895 | Poorly soluble     | Low           | No           | No            | 66.76  | 2                             | 0                                 |
| ZINC000085594065 | 580.63                   | 5.4685 | Poorly soluble     | Low           | No           | No            | 137.41 | 1                             | 0                                 |
| ZINC000100822646 | 494.49                   | 4.3531 | Poorly soluble     | Low           | No           | No            | 135.29 | 0                             | 0                                 |
| NANPDB5642       | 540.6                    | 1.0884 | Soluble            | Low           | No           | Yes           | 147.43 | 1                             | 1                                 |
| ZINC000095486235 | 448.51                   | 2.2118 | Moderately soluble | High          | Yes          | No            | 71.47  | 0                             | 0                                 |
| NANPDB2874       | 433.46                   | 2.1264 | Moderately         | High          | No           | Yes           | 109.05 | 0                             | 0                                 |

|                        |        |        |                    |      |     |     |        |   |   |
|------------------------|--------|--------|--------------------|------|-----|-----|--------|---|---|
|                        |        |        | soluble            |      |     |     |        |   |   |
| ZINC000035941652       | 324.37 | 4.0376 | Moderately soluble | High | Yes | Yes | 55.76  | 0 | 0 |
| NANPDB4566             | 382.49 | 4.4305 | Moderately soluble | High | Yes | Yes | 59.67  | 0 | 0 |
| NANPDB513              | 532.62 | 0.7872 | Soluble            | High | No  | Yes | 131.75 | 1 | 0 |
| Acetylaleuritolic acid | 498.74 | 6.5489 | Poorly soluble     | Low  | No  | No  | 63.60  | 1 | 0 |
| Rhemannic acid         | 552.78 | 7.1035 | Poorly soluble     | Low  | No  | Yes | 80.67  | 2 | 0 |
| Polycarpol             | 440.70 | 7.2941 | Poorly soluble     | Low  | No  | No  | 40.46  | 1 | 0 |

**Table S7:** Toxicological profiles of some selected compounds.

| <b>Compound</b>        | <b>Mutagenic</b> | <b>Tumorigenic</b> | <b>Reproductive Effect</b> | <b>Irritant</b> |
|------------------------|------------------|--------------------|----------------------------|-----------------|
| ZINC000095913861       | None             | None               | High                       | None            |
| ZINC000070455413       | None             | None               | None                       | None            |
| ZINC000103584225       | High             | None               | None                       | None            |
| ZINC000085530783       | None             | None               | None                       | None            |
| ZINC000085594065       | Low              | Low                | High                       | High            |
| ZINC000100822646       | None             | None               | None                       | None            |
| NANPDB5642             | None             | None               | None                       | None            |
| ZINC000095486235       | None             | None               | None                       | None            |
| NANPDB2874             | None             | None               | None                       | None            |
| ZINC000035941652       | None             | None               | None                       | None            |
| NANPDB4566             | None             | None               | None                       | None            |
| NANPDB513              | None             | None               | None                       | None            |
| Acetylaleuritolic acid | None             | None               | None                       | None            |
| Rhemannic acid         | None             | None               | None                       | High            |
| Polycarpol             | None             | None               | None                       | High            |

**Table S8:** Binding energies of the top 20 non-redundant lead compounds each of the TCM and Afro libraries and the top 11 onchocerca spp compounds against the three top models (ROB2, ITAS1 and MOD2).

| COMPOUND               | SOURCE | BINDING AFFINITY |       |       |
|------------------------|--------|------------------|-------|-------|
|                        |        | ROB2             | ITAS1 | MOD2  |
| ZINC000095913861       | TCM    | -12.7            | -10.2 | -11.9 |
| ZINC000085594065       | TCM    | -11.4            | -8.2  | -10.3 |
| ZINC000100822646       | TCM    | -11.4            | -7.8  | -9.4  |
| ZINC000103543220       | TCM    | -11.3            | -9.3  | -10.1 |
| ZINC000002151115       | TCM    | -11.2            | -7.8  | -9.3  |
| ZINC000042876996       | TCM    | -11.2            | -8.0  | -9.2  |
| ZINC000004731235       | TCM    | -11.1            | -7.5  | -9.3  |
| ZINC000085594104       | TCM    | -11.1            | -9.0  | -9.6  |
| ZINC000085594687       | TCM    | -11.1            | -7.4  | -8.9  |
| ZINC000095910593       | TCM    | -11.1            | -8.7  | -8.7  |
| ZINC000095912193       | TCM    | -11.1            | -8.1  | -9.2  |
| NANPDB2874             | Afro   | -11.1            | -7.5  | -8.5  |
| ZINC000095486235       | Afro   | -11.1            | -7.1  | -9.4  |
| ZINC000070454399       | TCM    | -11.0            | -7.3  | -8.8  |
| ZINC000085530164       | TCM    | -11.0            | -10.1 | -9.2  |
| ZINC000085543245       | TCM    | -11.0            | -8.3  | -10.2 |
| ZINC000085568136       | TCM    | -11.0            | -8.7  | -10.1 |
| ZINC000085568150       | TCM    | -11.0            | -8.6  | -11.5 |
| ZINC000085594672       | TCM    | -11.0            | -7.4  | -8.4  |
| NANPDB4566             | Afro   | -11.0            | -7.9  | -9.3  |
| NANPDB513              | Afro   | -11.0            | -7.5  | -9.4  |
| ZINC000035941652       | Afro   | -11.0            | -7.7  | -9.4  |
| ZINC000013384209       | TCM    | -10.9            | -8.0  | -9.7  |
| ZINC000070450912       | TCM    | -10.9            | -8.5  | -9.2  |
| ZINC000070454467       | TCM    | -10.9            | -8.7  | -9.8  |
| NANPDB4306             | Afro   | -10.9            | -7.8  | -9.3  |
| ZINC000095485962       | Afro   | -10.9            | -8.8  | -10.3 |
| NANPDB1649             | Afro   | -10.7            | -7.5  | -9.2  |
| NANPDB3795             | Afro   | -10.7            | -7.7  | -10.4 |
| NANPDB4605             | Afro   | -10.7            | -7.7  | -9.5  |
| NANPDB2966             | Afro   | -10.6            | -7.4  | -10.1 |
| NANPDB4136             | Afro   | -10.6            | -7.3  | -8.6  |
| ZINC000100003095       | Afro   | -10.6            | -8.8  | -9.3  |
| NANPDB347              | Afro   | -10.5            | -7.5  | -9.1  |
| NANPDB4312             | Afro   | -10.5            | -8.0  | -9.2  |
| ZINC000095485942       | Afro   | -10.5            | -8.8  | -9.4  |
| ZINC000095486126       | Afro   | -10.5            | -7.9  | -9.6  |
| NANPDB488              | Afro   | -10.4            | -7.6  | -9.2  |
| ZINC000095485936       | Afro   | -10.4            | -7.7  | -9.2  |
| ZINC000095486074       | Afro   | -10.4            | -8.1  | -9.2  |
| Acetylaleuritolic acid | Oncho  | -10.3            | -7.9  | -9.1  |
| Rhemannic acid         | Oncho  | -9.5             | -8.4  | -8.9  |
| Polycarpol             | Oncho  | -9.2             | -8.2  | -8.8  |

|                        |       |      |      |      |
|------------------------|-------|------|------|------|
| Ellagic acid           | Oncho | -8.6 | -6.8 | -8.2 |
| Voacangine             | Oncho | -7.9 | -6.6 | -7.1 |
| Germacrone             | Oncho | -7.5 | -7.1 | -6.6 |
| Cardinol               | Oncho | -7.4 | -7.2 | -6.5 |
| Cyperotundone          | Oncho | -7.4 | -6.7 | -6.7 |
| Alpha terpinyl acetate | Oncho | -7.2 | -6.3 | -5.8 |
| Caryophyllene oxide    | Oncho | -7.2 | -6.7 | -6.7 |
| Cedrol                 | Oncho | -7.0 | -7.1 | -6.7 |

**Table S9:** Previously modelled WSP structures and the templates used. N/A: Not available in article.

| Organism WSP is found          | WSP Sequence ID         | Template for Modelling                                                                                                                                                                                                                                               | Sequence Identity of Template (%) | Type of Study                                                                                                                                                                                                                                                                                                                                                                                 | Reference |
|--------------------------------|-------------------------|----------------------------------------------------------------------------------------------------------------------------------------------------------------------------------------------------------------------------------------------------------------------|-----------------------------------|-----------------------------------------------------------------------------------------------------------------------------------------------------------------------------------------------------------------------------------------------------------------------------------------------------------------------------------------------------------------------------------------------|-----------|
| <i>Drosophila melanogaster</i> | NP_966785.1 (SWISSPROT) | Chain A: Crystal Structure of Neisserial Surface Protein A (Nspa) PDB ID: 1P4T                                                                                                                                                                                       | 34                                | 1. Modelling of WSP in <i>D. melanogaster</i> [1].                                                                                                                                                                                                                                                                                                                                            | [1,2]     |
| <i>Asobara tabida</i>          | AAW78819.1 (SWISSPROT)  | Chain A: Crystal Structure of Neisserial Surface Protein A (Nspa) PDB ID: 1P4T                                                                                                                                                                                       | N/A                               | 2. Comparative study of 3 different WSP modelled structures (in <i>D. melanogaster</i> , <i>A. tabida</i> and <i>B. malayi</i> ) [2].                                                                                                                                                                                                                                                         | [2]       |
| <i>Brugia malayi</i>           | AAW70873.1 (SWISSPROT)  | Chain A: Crystal Structure of Neisserial Surface Protein A (Nspa) [PDB ID: 1P4T]                                                                                                                                                                                     | N/A                               |                                                                                                                                                                                                                                                                                                                                                                                               | [2]       |
| <i>Exorista sorbillans</i>     | G1EHU4 (UniProt)        | 1. Chain B: Stonustoxin Structure (PDB ID: 4WVM)<br><br>2. Chain A: Hemagglutinin-esterase-fusion Mutant Structure of Influenza D Virus (PDB ID: 5E5W)<br><br>3. Chain A: Crystal Structure of Neisserial Surface Protein A (Nspa) [PDB ID: 1P4T]<br><br>4. Chain A: | 30<br><br>25<br><br>27<br><br>24  | The study modelled the WSP structure using multiple-templates homology modelling (using all 5 templates) [3]. The study also modelled 5 different structures using each of the 5 templates. The structures were then compared and the 1P4T-based WSP structure was selected as the reasonably best upon evaluating the quality of the models [3]. The selected structure was docked against 7 | [3]       |



|  |  |                                                                                                                                                                                         |    |                                                                              |  |
|--|--|-----------------------------------------------------------------------------------------------------------------------------------------------------------------------------------------|----|------------------------------------------------------------------------------|--|
|  |  | <p>Hemagglutinin-esterase-fusion Protein Structure of Influenza D Virus (PDB ID: 5E64)</p> <p>5. Chain A: NMR Solution Structure of Opa60 from <i>N. gonorrhoeae</i> (PDB ID: 2MLH)</p> | 57 | <p>proteins involved in the Ethanol stressed pathway of HepG2 cells [3].</p> |  |
|--|--|-----------------------------------------------------------------------------------------------------------------------------------------------------------------------------------------|----|------------------------------------------------------------------------------|--|

## 2 Supplementary Figures

A)

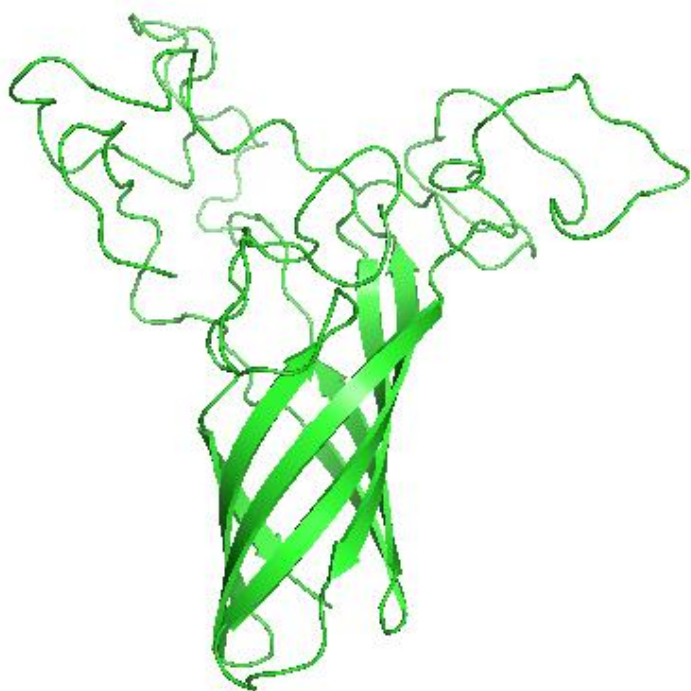

B)

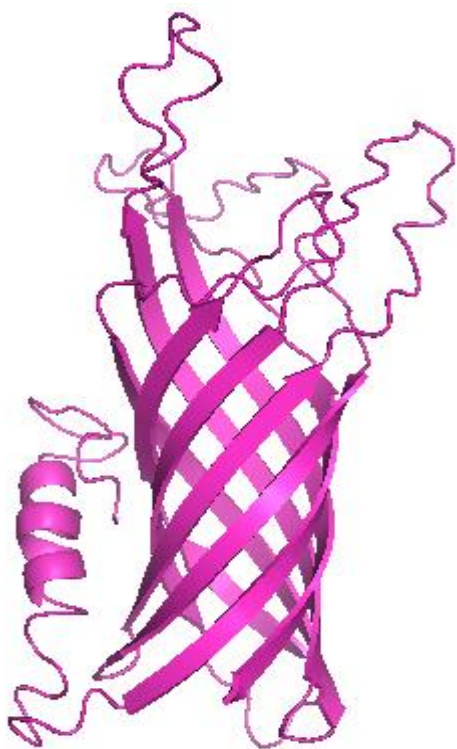

C)

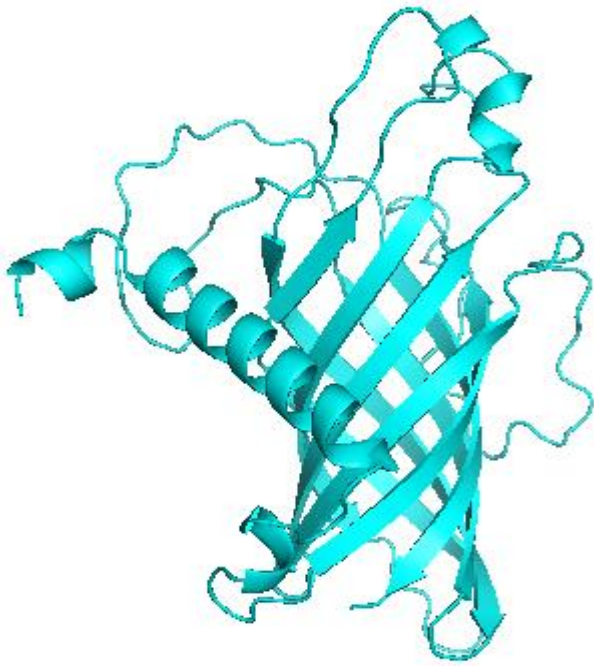

**Figure S1:** Cartoon representation of the top 3 predicted tertiary structures of the *Wolbachia* surface protein from the 3 techniques used: (A) MOD2 (B) ITAS1 and (C) ROB2. ITAS1 is in magenta, ROB2 in cyan and MOD2 in green.

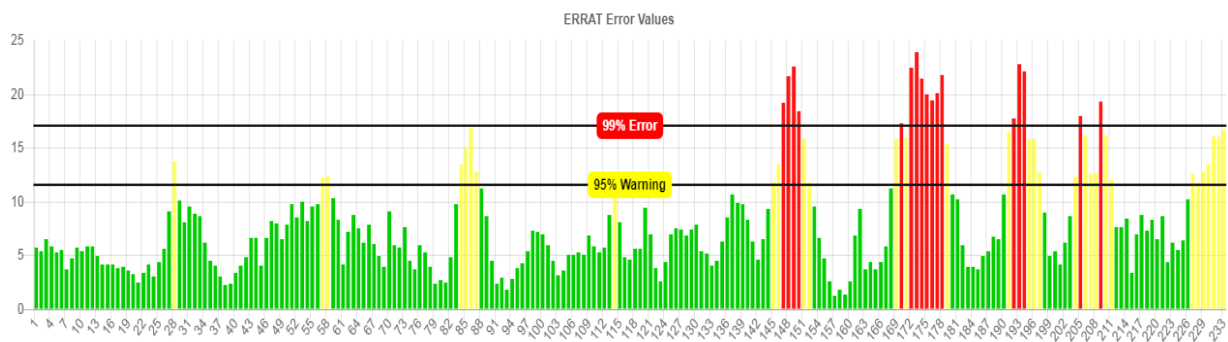

**Figure S2:** ERRAT plot for the WSP model. Red bars identify the misfolded region located distantly from the active site, yellow bars demonstrate the error region between 95% and 99%, and green bars indicate the region with a lower error rate for protein folding.

A)

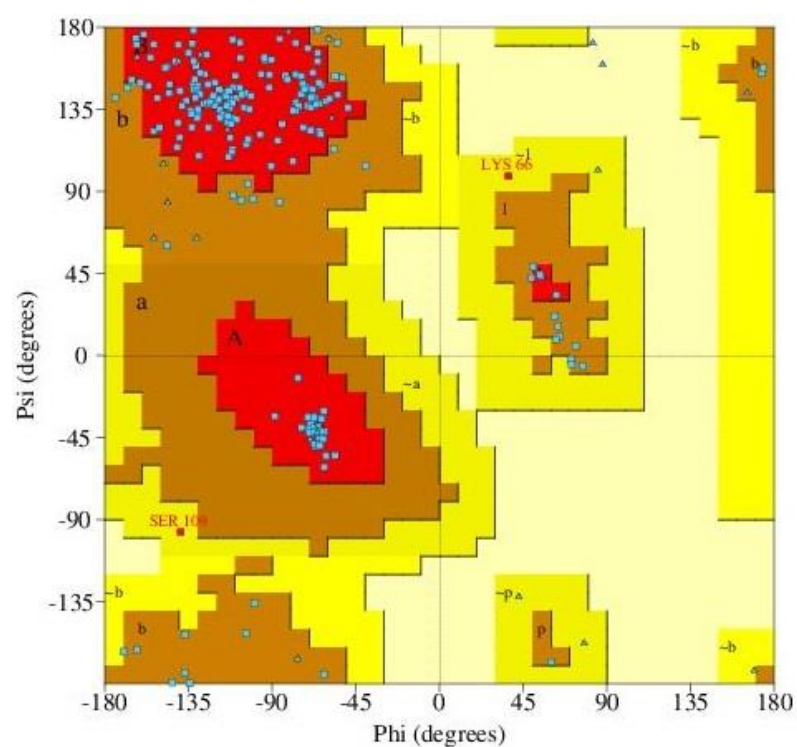

B)

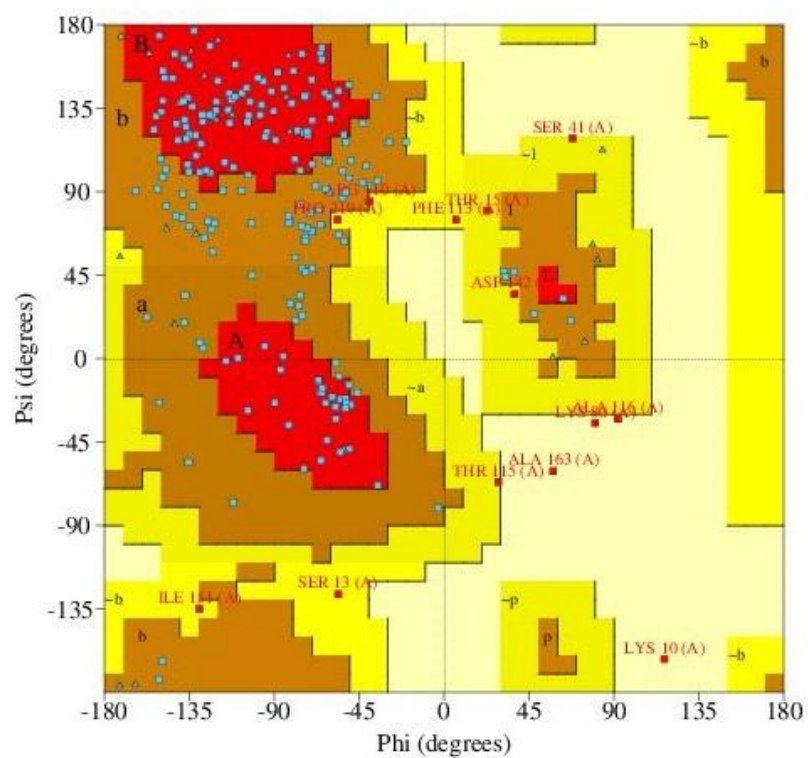

**Figure S3:** Ramachandran plots of the protein structures obtained via PROCHECK. (A) Ramachandran plot of protein model MOD2 and (B) Ramachandran plot of protein model

ITAS1. The percentages of residues of model MOD2 in the most favoured regions, additionally allowed regions, generously allowed regions and disallowed regions are 82.5, 16.5, 1.0 and 0.0%, respectively. For model ITAS1, 53.9, 40.3, 3.9 and 1.9% of the amino acid residues were predicted to be in the most favoured, additionally allowed, generously allowed and disallowed regions, respectively.

A)

#### Overall model quality

Z-Score: **-4.02**

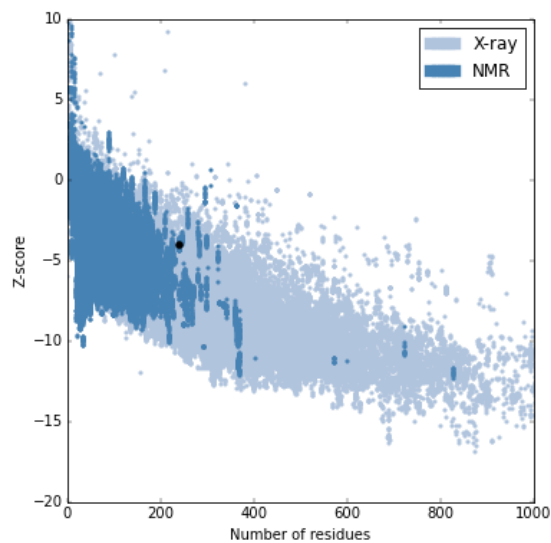

B)

#### Local model quality

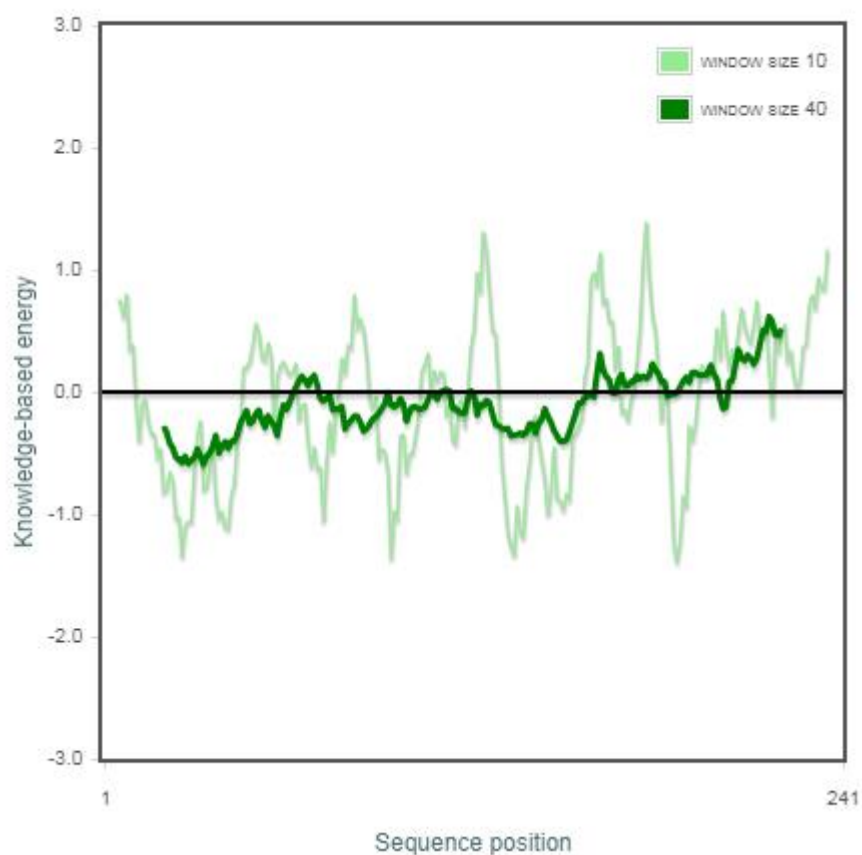

**Figure S4:** Protein quality evaluation using ProSA. A) ProSA-web z-score of the WSP indicating the overall model quality. B) ProSA-web local model quality of the WSP by plotting energies as a function of amino acid sequence position.



A)

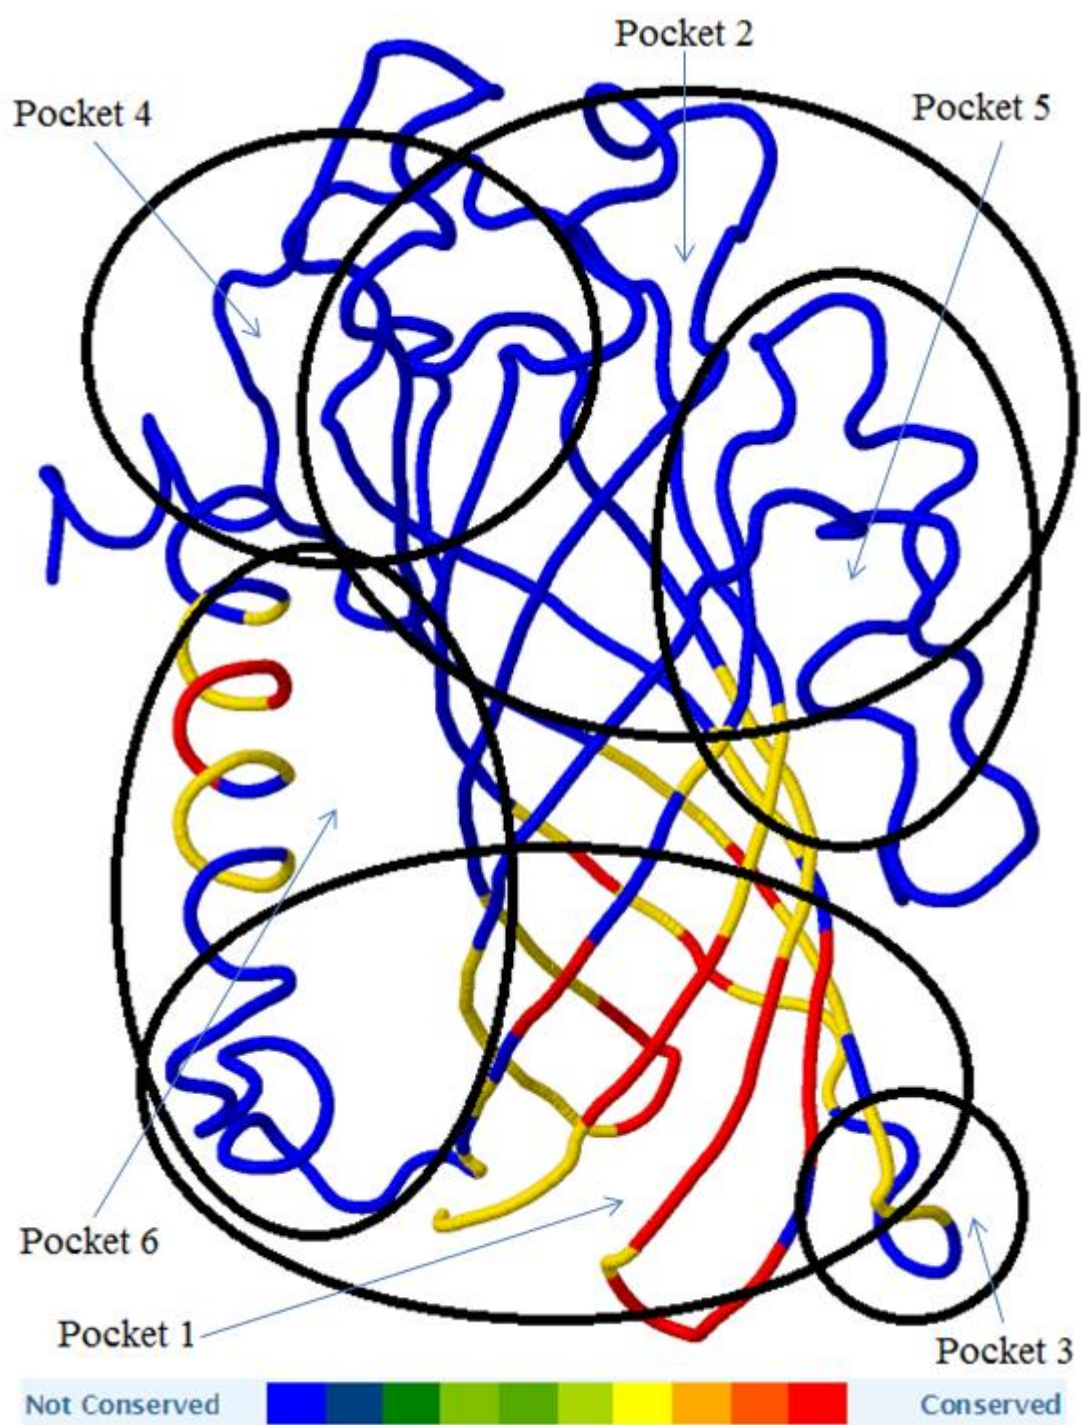

B

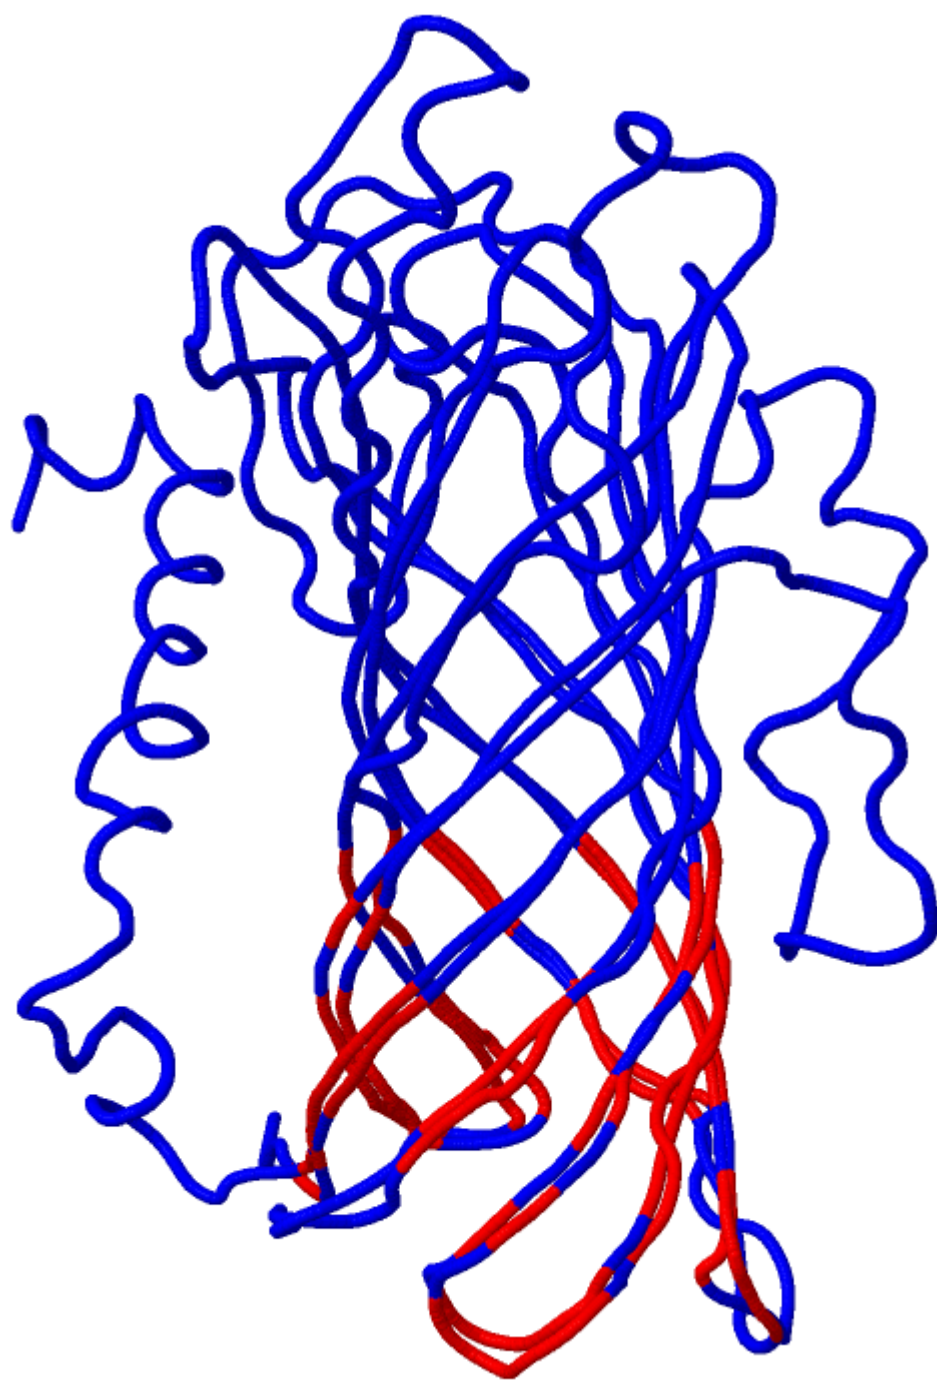



C)

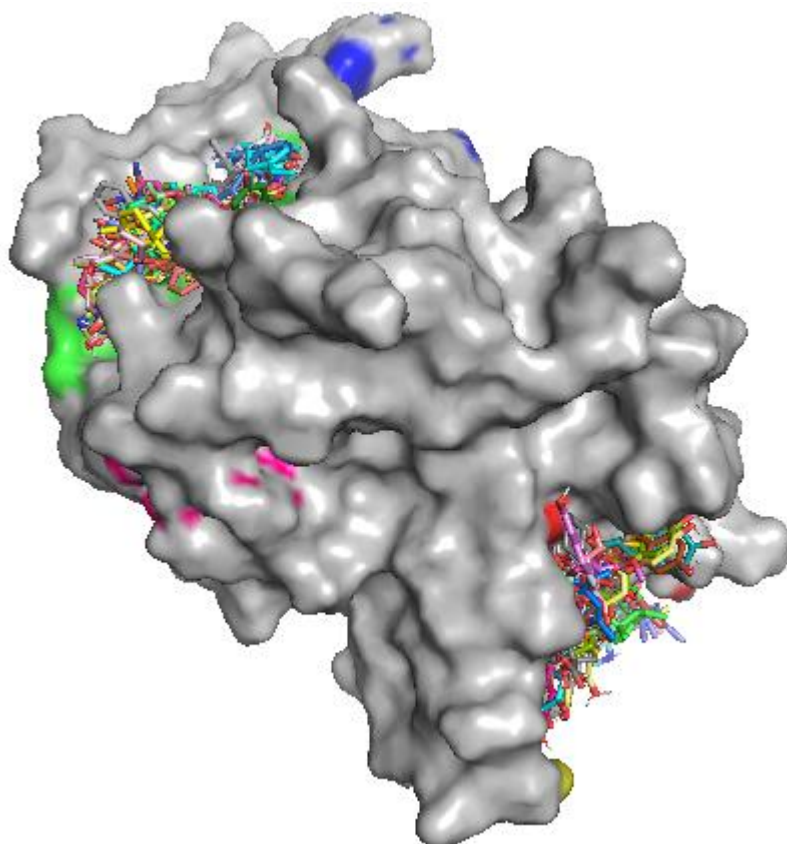

**Figure S5:** Predicted binding sites of the WSP (ROB2 model). (A) Binding site positions are shown with respect to conservation; (B) Superimposition of WSP (ROB2 model) and 1P4T (template structure) showing conserved binding site region in red and unconserved sites in blue; and (C) Ligands docked into the binding sites of the WSP. In (C), the protein is shown as a grey surface representation while pockets 1, 2, 3, 4, 5 and 6 are coloured red, green, yellow, blue, hotpink and cyan, respectively.

A)

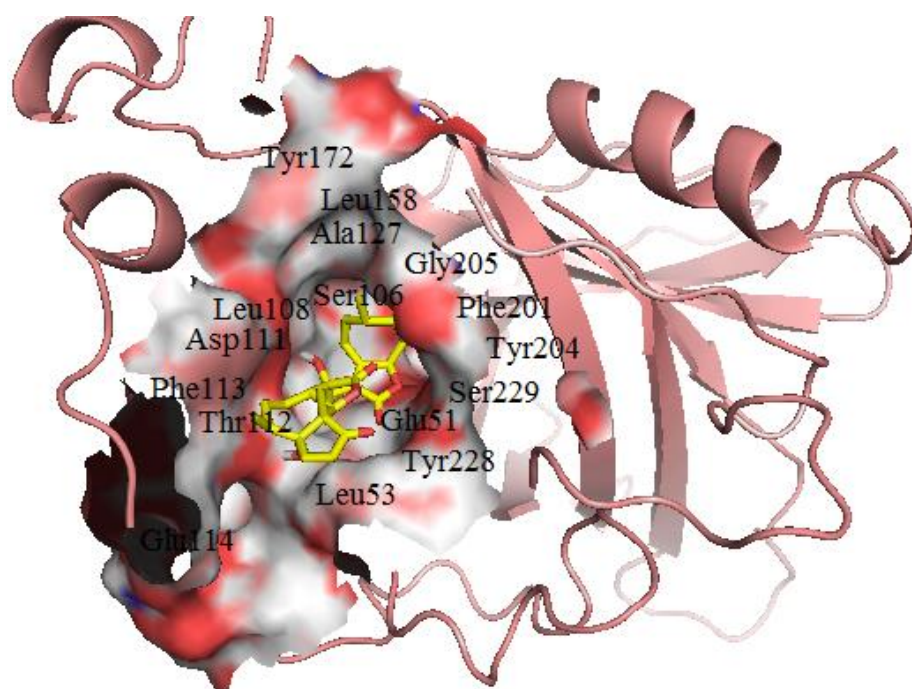

B)

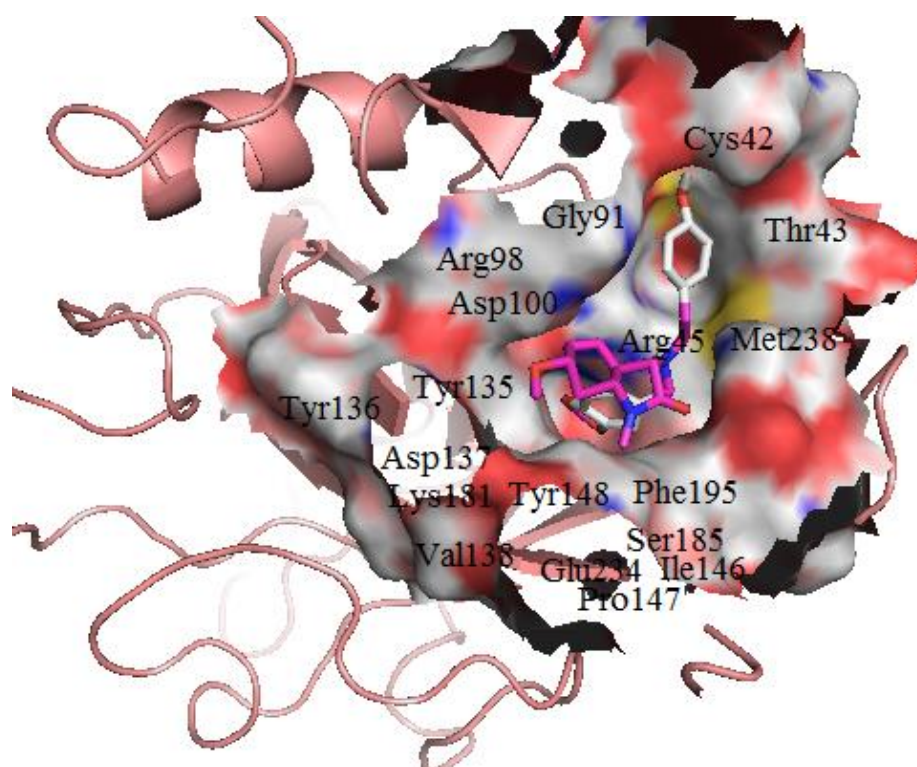

C)

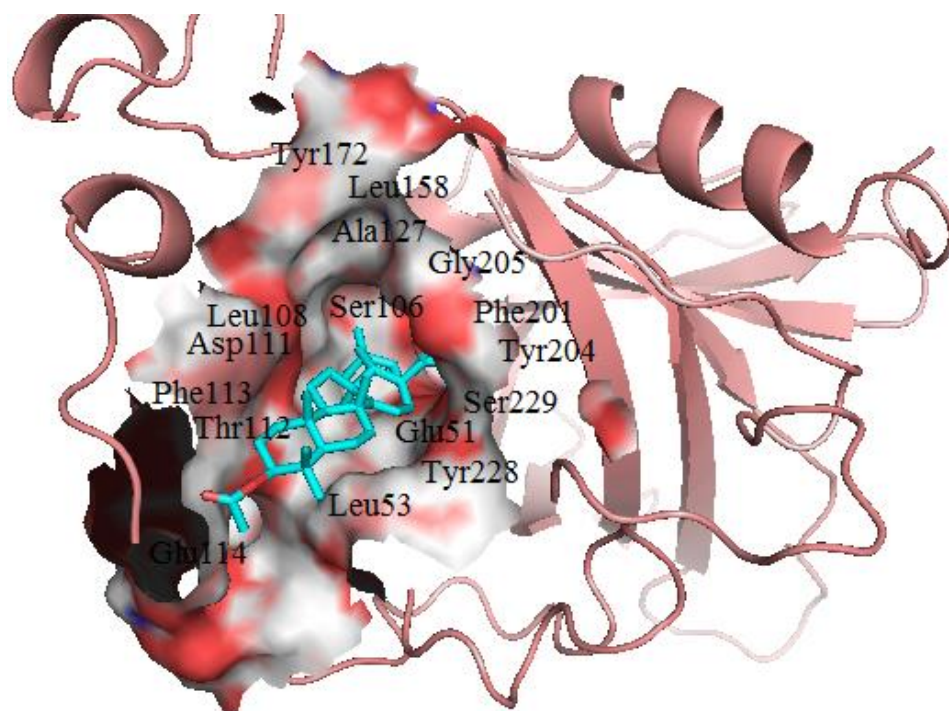

**Figure S6:** Cartoon representation of the WSP in complex with (A) NANPDB5642, (B) ZINC000095486235 and (C) acetylaleuritolic acid. The binding sites are represented as surface and the ligands are shown as sticks.

A)

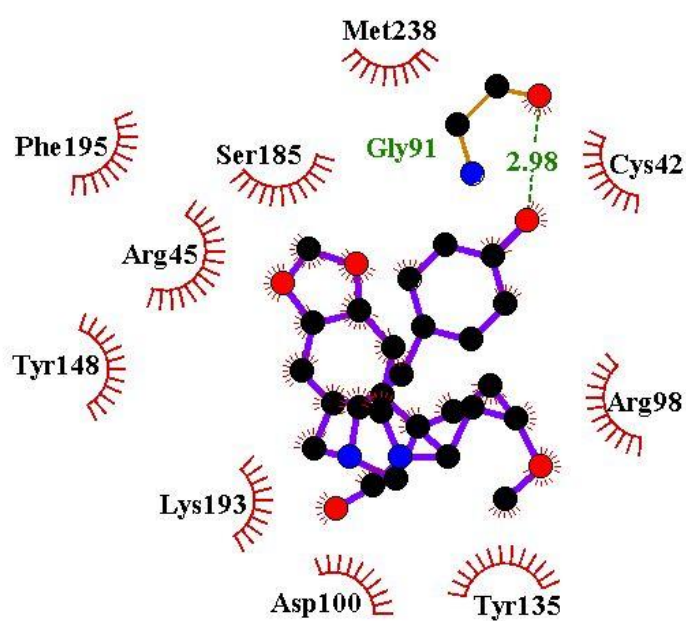

B)

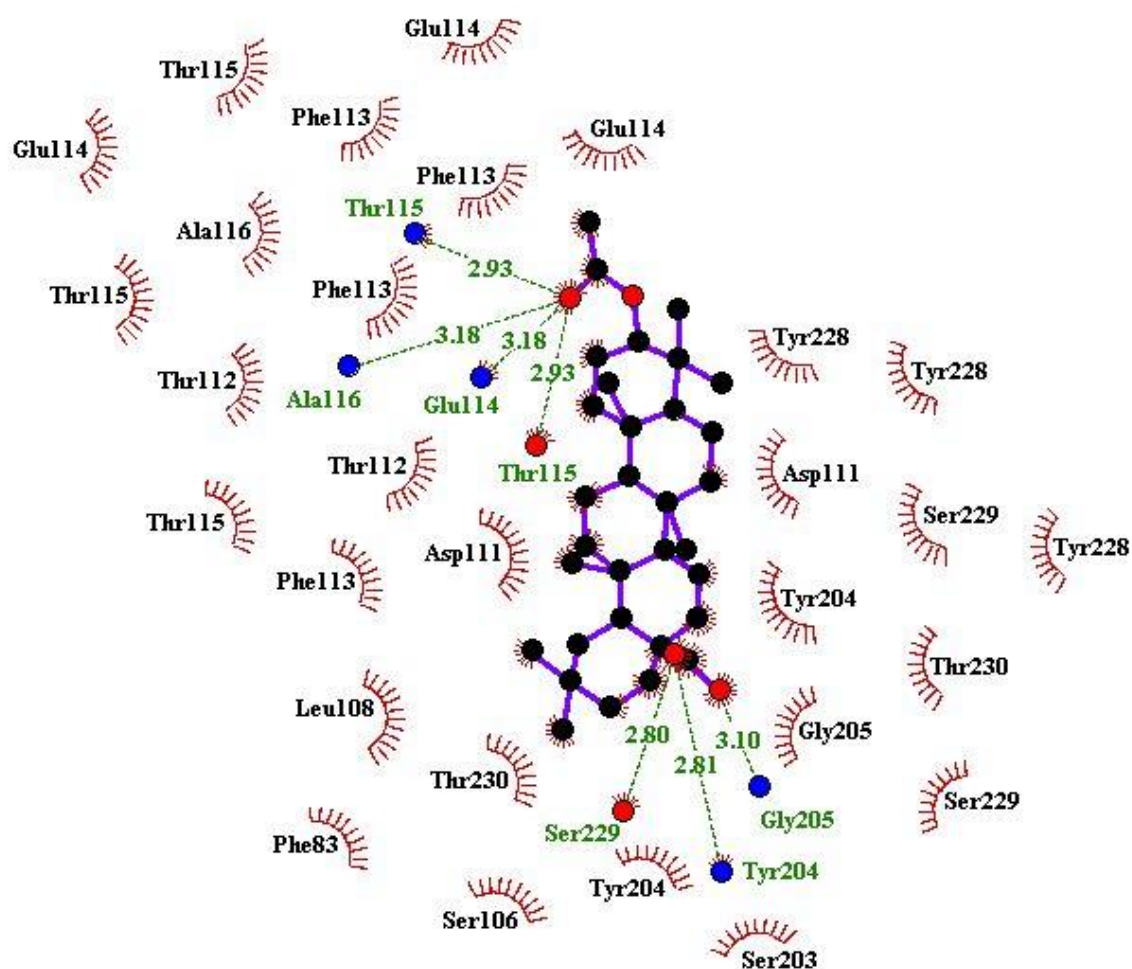

**Figure S7:** Two-dimensional plots of the WSP-ligand interactions generated using LigPlot+. Interaction profiles of (A) WSP- ZINC000095486235 complex and (B) WSP-Acetylauritic acid complex. Hydrophobic contacts are represented as red spoke arcs, hydrogen bonds are represented as green dash lines and the ligands are colored purple.

A)

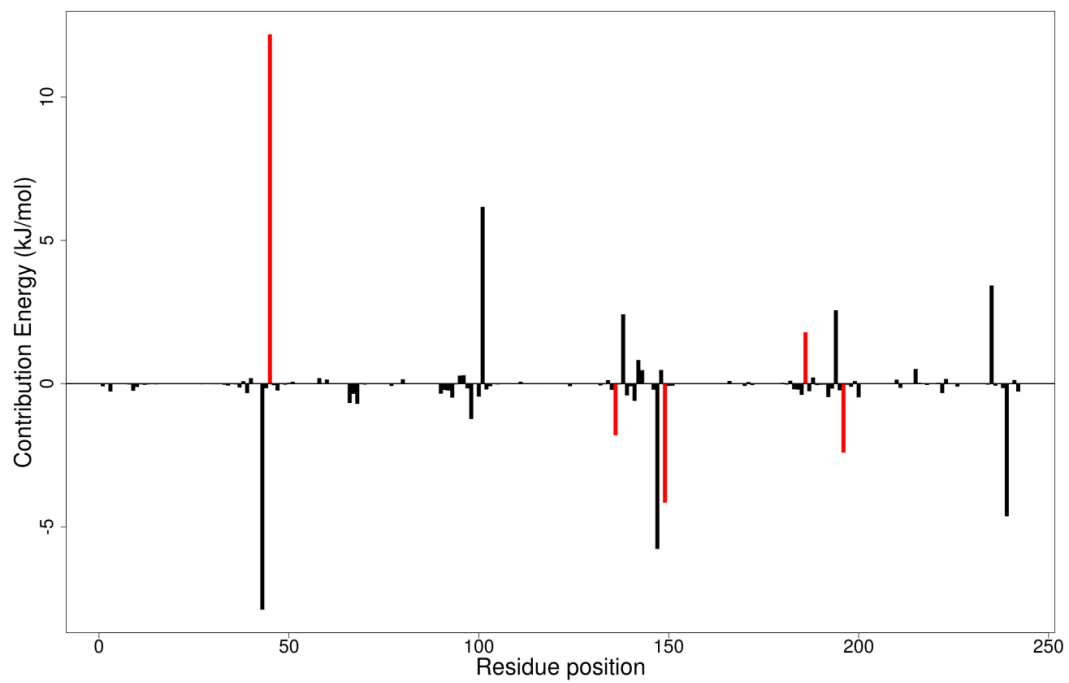

B)

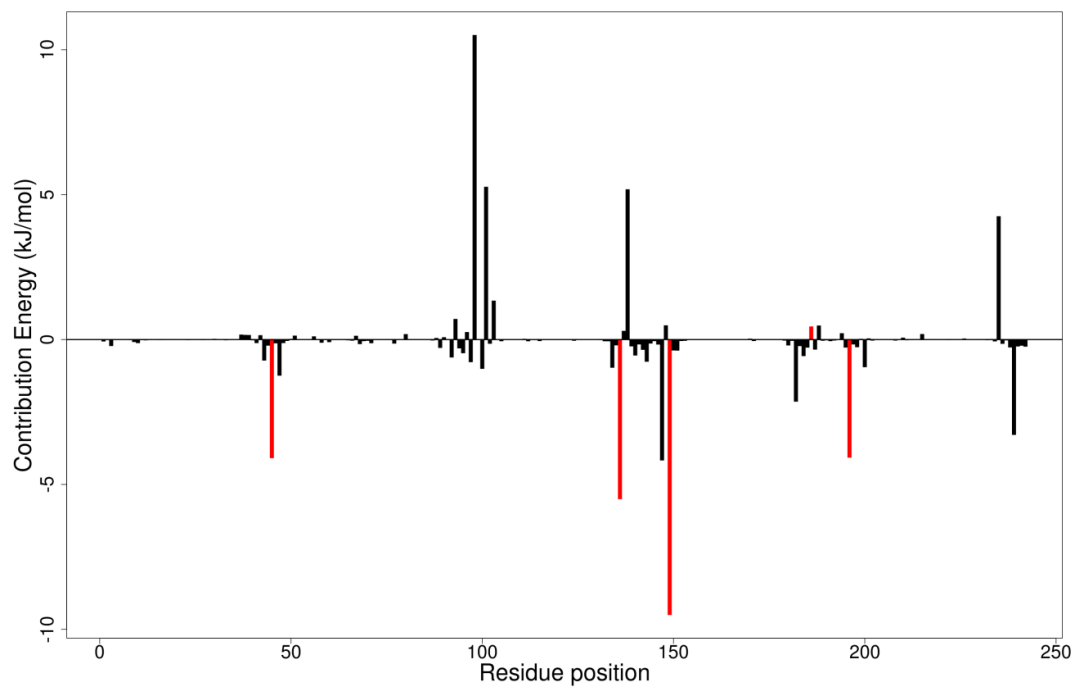

C)

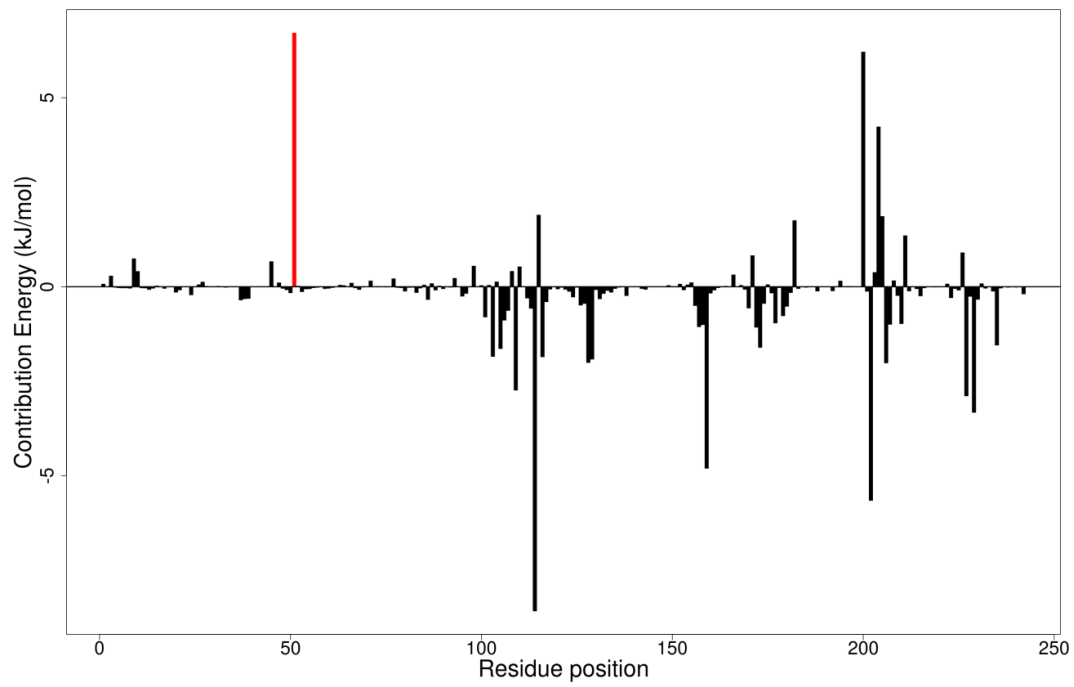

D)

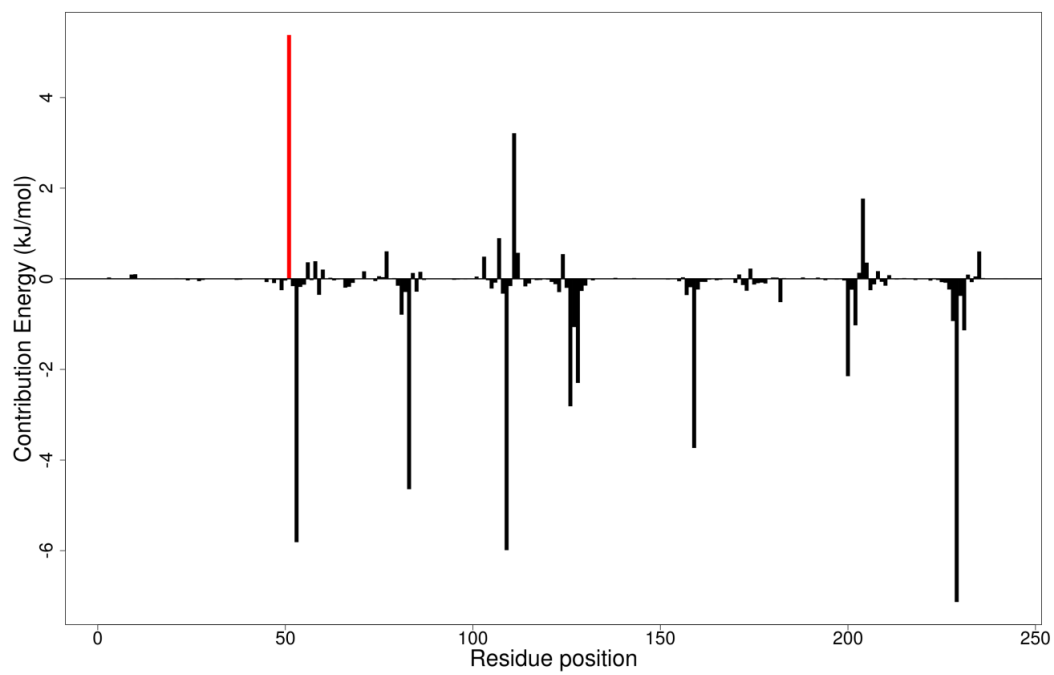



E)

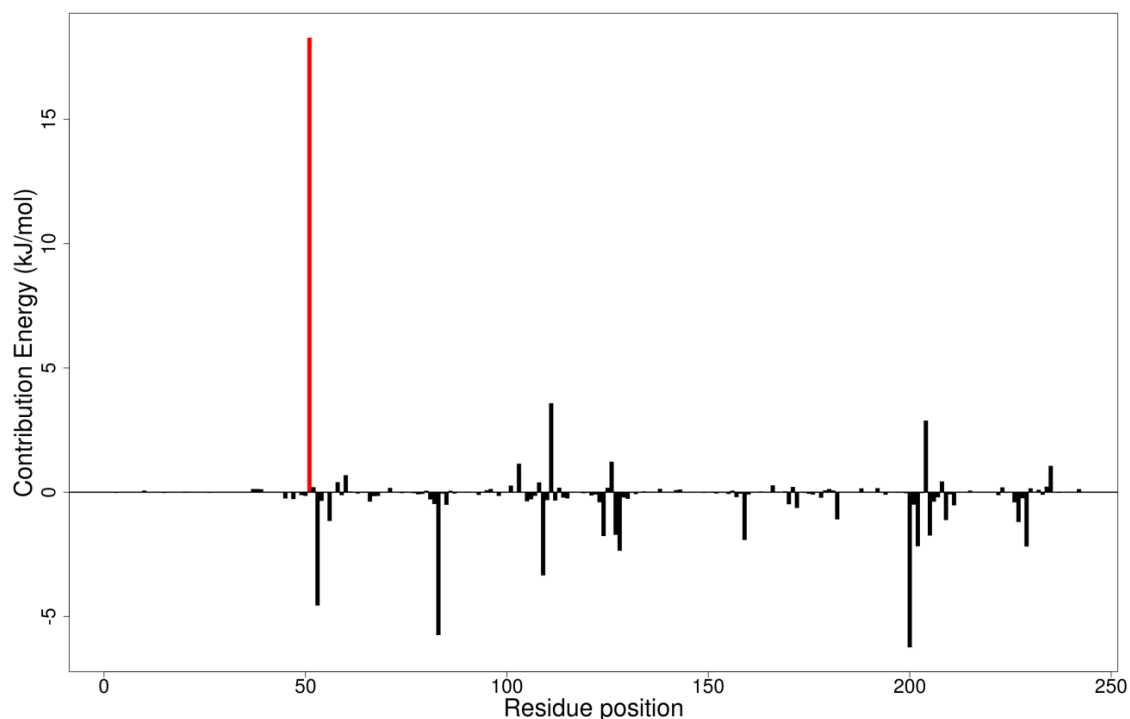

**Figure S8:** Molecular mechanics/Poisson-Boltzmann surface area (MMPBSA) plots showing the binding free energy contribution per residue of the (A) WSP-ZINC000095486235, (B) WSP-ZINC000035941652, (C) WSP-ZINC000095913861, (D) WSP-acetylaleuritolic acid and (E) WSP-rhemannic acid complexes.

### 3 References

1. Uday, J.; Huchesh, C.; Chethana, V.; Puttaraju, H. Insilco Analysis of Wolbachia Surface Protein in Wolbachia Endosymbiont of *D. Melenogaster*. *Biomirror* **2014**, *5*, 24–29.
2. Uday, J.; Puttaraju, H.P. Comparative analysis of Wolbachia surface protein in *D. melanoagster*, *A. tabida* and *B. malayi*. *Bioinformation* **2012**, *8*, 711–715, doi:10.6026/97320630008711.
3. Kishore, V.; Puttaraju, H. Homology modelling and simulation of Wolbachia surface protein ( WSP ) of *Uzifly* and study of its Insilico protein-protein anti-apoptosis interaction process with ethanol stressed HepG2 Cell line pathway proteins. *J. Pharmacogn. Phytochem.* **2019**, *8*, 618–624.
